# Supplementary material
Source: PubMed Central journal article supplement (PMC7126421)
Supplement: mmc1.pdf [file mmc1.pdf]

**DAILY SCREENING LOG**

**Pilot Study of ICU Surveillance of SARI 2013-14**

Week: From \_\_\_/\_\_\_/\_\_\_ TO \_\_\_/\_\_\_/\_\_\_

| S. no                            | R No/HFN | ICU admission<br>(DD/MM/YYYY) | Elig criteria 1<br>Yes/No | Elig criteria 2<br>Yes/No | Elig criteria 3<br>1. Travel<br>2. Occupation<br>3. Animal<br>4. Others | Comments |
|----------------------------------|----------|-------------------------------|---------------------------|---------------------------|-------------------------------------------------------------------------|----------|
| Screening date (___/___/___) MON |          |                               |                           |                           |                                                                         |          |
| 1.                               |          |                               |                           |                           |                                                                         |          |
| 2.                               |          |                               |                           |                           |                                                                         |          |
| 3.                               |          |                               |                           |                           |                                                                         |          |
| Screening date (___/___/___) TUE |          |                               |                           |                           |                                                                         |          |
| 4.                               |          |                               |                           |                           |                                                                         |          |
| 5.                               |          |                               |                           |                           |                                                                         |          |
| 6.                               |          |                               |                           |                           |                                                                         |          |
| 7.                               |          |                               |                           |                           |                                                                         |          |
| Screening date (___/___/___) WED |          |                               |                           |                           |                                                                         |          |
| 8.                               |          |                               |                           |                           |                                                                         |          |
| 9.                               |          |                               |                           |                           |                                                                         |          |
| 10.                              |          |                               |                           |                           |                                                                         |          |
| Screening date (___/___/___) THR |          |                               |                           |                           |                                                                         |          |
| 11.                              |          |                               |                           |                           |                                                                         |          |
| 12.                              |          |                               |                           |                           |                                                                         |          |
| 13.                              |          |                               |                           |                           |                                                                         |          |
| Screening date (___/___/___) FRI |          |                               |                           |                           |                                                                         |          |
| 14.                              |          |                               |                           |                           |                                                                         |          |
