# Supplementary material
Source: PubMed Central journal article supplement (PMC7126421)
Supplement: mmc2.pdf [file mmc2.pdf]

**Pilot Study of ICU Surveillance of SARI 2013-14**

**WEEKLY LOGSHEET**

*(NOTE: TO BE COMPLETED FOR THE PRIOR WEEK AND TO BE SENT EVERY MONDAY TO COORDINATING CENTRE)*

1. Hospital Name: \_\_\_\_\_

Week: From \_\_\_\_/\_\_\_\_/\_\_\_\_ TO \_\_\_\_/\_\_\_\_/\_\_\_\_

2. No. of ICU Admissions during the Week:

3. No. of Patients Meeting :

1. Eligibility criteria 1 (severe illness)

2. Eligibility criteria 2 (diagnosis except H1N1)

4. No. of Patients Meeting Exposure Eligibility Criteria Related to:

1. Travel

2. Occupational

3. Animal

4. Others, specify

5. No. of Patients Included in the study:

6. No. of Lab Confirmed Diagnosis of SRI  
(not including H1N1):

7. No. of Deaths Related to SRI:

**Comments, if any:**

---

---

---

---

---

---

---

---

---

---
